# Supplementary material for: Correlated miR-mRNA Expression Signatures of Mouse Hematopoietic Stem and Progenitor Cell Subsets Predict “Stemness” and “Myeloid” Interaction Networks
Source: PLoS One. 2014 Apr 18;9(4):e94852. doi: 10.1371/journal.pone.0094852 (PMC3991639; doi:10.1371/journal.pone.0094852)
Supplement: Table S5 — Predicted Targets of MEP miRs. 55 targets predicted by TargetScan and/or MiRanda to have binding sites for at least one “MEP miR”. Additionally, each target shows a statistically significant inverse pattern of expression with its targeting miR, across our 6 HSPC populations (p<0.05). (DOCX) [file pone.0094852.s005.docx]

**Table S5: Predicted targets of “MEP miRs”**

| **MEP Targets** | | | |
| --- | --- | --- | --- |
| | Prdm16 | | --- | | Bach2 | | Trp53inp1 | | Mycn | | Meis1 | | Nfia | | Lpp | | Met | | Slc30a4 | | Trps1 | | Fmnl2 | | 9830001H06Rik | | Vldlr | | Snn | | | Arhgef3 | | --- | | Tfrc | | Zfhx3 | | Nav1 | | Ece1 | | Prkce | | Antxr2 | | Ccnk | | Mllt4 | | Cd2ap | | Hoxa10 | | Mtpn | | Cerk | | Emid1 | | | Glis2 | | --- | | Camk2g | | Gata2 | | Rhoq | | Slco3a1 | | Ets1 | | Spnb2 | | Nfat5 | | Nkx2-3 | | Btaf1 | | Zfp827 | | Spnb1 | | Stk16 | | Pde1b | | | Mllt6 | | --- | | Csf1 | | Rab6b | | Unc5a | | Abcg4 | | Carhsp1 | | Paqr4 | | Mpl | | 5031439G07Rik | | Coro2a | | Crim1 | | Psmb8 | | Esr1 | |
